# Supplementary material for: Template synthesis of tungsten complexes with saturated N-heterocyclic carbene ligands
Source: Royal Society of Chemistry journal article supplement (doi:10.1039/b510996e), 2005-01-01
Supplement: b510996e.pdf [file b510996e.pdf]

# **Template synthesis of tungsten complexes with saturated N-heterocyclic carbene ligands**

**F. Ekkehardt Hahn, Volker Langenhahn and Tania Pape**

## **Supplementary Information**

(Synthesis of compounds **1-4** and of complexes **5, 7** and **8**)

**2-Azidoethyl amine 2:** The compound was prepared according to the method reported by Forster and Newman.<sup>1</sup> Commercially available (Aldrich) 2-bromoethyl amine hydrobromide (25 g, 122 mmol) was dissolved in water (50 ml) and sodium azide (14 g, 215 mmol) dissolved in water (50 mL) was added. The reaction solution was heated to 70 °C for 5 h. After cooling to ambient temperature 50 g of KOH were added to the reaction mixture and 2-azidoethyl amine was separated together with water by a steam distillation. Addition of KOH to the distillate separated the free amine as a separate phase from the aqueous phase. The free amine was washed from the aqueous phase with diethyl ether. Removal of the diethyl ether at 0 °C under reduced pressure gave crude **2**. Distillation of the crude product from KOH pellets gave **2** as a colorless oil. Yield 5.2 g (60.4 mmol, 49.5 %). <sup>1</sup>H NMR (200 MHz, benzene-*d*<sub>6</sub>):  $\delta$  2.76 (t, 2H, <sup>3</sup>*J*<sub>HH</sub> = 6 Hz, CH<sub>2</sub>-N<sub>3</sub>), 2.38 (t, 2H, <sup>3</sup>*J*<sub>HH</sub> = 6 Hz, CH<sub>2</sub>-NH<sub>2</sub>), 1.38 (s, br, 2H, NH<sub>2</sub>); <sup>13</sup>C{<sup>1</sup>H} NMR (50.1 MHz, benzene-*d*<sub>6</sub>):  $\delta$  54.6 (s, CH<sub>2</sub>-N<sub>3</sub>), 41.4 (s, CH<sub>2</sub>-NH<sub>2</sub>).

**2-Azidoethyl formamide 3:** A sample of compound **2** (5 g, 58.1 mmol) in THF (50 ml) was reacted with an 1.1 molar amount of the mixed formamide CH<sub>3</sub>C(O)OC(O)H obtained from sodium formate and acetyl chloride at 25 °C for 1 h.<sup>2</sup> After removal of the solvent, the crude product was distilled under vacuum (0.07 mbar, 160 °C) to yield **3** as a colorless oil (5.3 g, 46.4 mmol, 80 %). <sup>1</sup>H NMR (200 MHz, CDCl<sub>3</sub>):  $\delta$  8.05 (s, 1H, NHCHO), 7.18 (s, 1H, NHCHO), 3.31 (m, 4H, CH<sub>2</sub>); <sup>13</sup>C{<sup>1</sup>H} NMR (50.1 MHz, CDCl<sub>3</sub>):  $\delta$  161.5 (s, NHCHO), 49.5 (s, CH<sub>2</sub>-N<sub>3</sub>), 36.4 (s, CH<sub>2</sub>-NHC(O)H); MS (EI): *m/z* 115 (72, [MH]<sup>+</sup>); IR (KBr):  $\nu$  2103 (st, N<sub>3</sub>), 1667 (s, CO).

**2-Azidoethyl isocyanide 4:** The formamide **3** was dehydrated to give the isocyanide **4** using a procedure described by Casanova.<sup>3</sup> Formamide **3** (5 g, 43.8 mmol) was added to a solution of 1.1 equivalents of *p*-toluenesulfonyl chloride (9.19 g, 48.2 mmol) in 25 ml of chinoline. The clear solution was stirred for 10 min at ambient temperature. The volatile isocyanide **4** was then removed from the reaction mixture under vacuum by distillation into a cold trap (cooled with liquid nitrogen) for 1 h. A colorless, volatile oil with an intense smell was obtained (0.85 g, 8.8 mmol, 20 %). **4:** <sup>1</sup>H NMR (300 MHz, THF-*d*<sub>8</sub>):  $\delta$  3.60 (m, 4H, CH<sub>2</sub>); <sup>13</sup>C{<sup>1</sup>H} NMR (75.4 MHz, THF-*d*<sub>8</sub>):  $\delta$  160.3 (t, <sup>1</sup>*J*<sub>CN</sub> = 4.5 Hz, CN), 50.0 (CH<sub>2</sub>-N<sub>3</sub>), 41.2 (t, <sup>1</sup>*J*<sub>CN</sub> = 7.0 Hz, CH<sub>2</sub>-NC); IR (benzene):  $\nu$  2152 (s, CN), 2109 (s, N<sub>3</sub>).

**[W(4)(CO)<sub>5</sub>] 5:** The tungsten complex **5** was prepared as described for tungsten complexes with the related 2-azidophenyl isocyanide ligand.<sup>4</sup> Tungsten hexacarbonyl (0.7 g, 2 mmol)

dissolved in 500 ml of THF was irradiated in a photoreactor (high-pressure mercury vapor lamp) for 4 h. Complete formation of  $[\text{W}(\text{CO})_5(\text{THF})]$  was assumed after this reaction time. To the solution of the  $[\text{W}(\text{CO})_5(\text{THF})]$  complex was added an excess of isocyanide **4** (0.29 g, 3 mmol). The reaction mixture was stirred for 12 h at ambient temperature. Removal of the solvent and excess isocyanide gave a yellow powder. Complex **5** was purified by column chromatography (neutral  $\text{Al}_2\text{O}_3$ , hexane/diethyl ether 10:1, v:v). A yellow powder was obtained (0.67 g, 1.6 mmol, 80 %). Crystals of **5** could be obtained by recrystallization from hexane at  $-20\text{ }^\circ\text{C}$ .  $^1\text{H}$  NMR (300 MHz,  $\text{CDCl}_3$ ):  $\delta$  3.89 (t,  $^3J_{\text{HH}} = 6\text{ Hz}$ , 2H,  $\text{CH}_2\text{-N}_3$ ), 3.65 (t,  $^3J_{\text{HH}} = 6\text{ Hz}$ , 2H,  $\text{CH}_2\text{-CN}$ );  $^{13}\text{C}\{^1\text{H}\}$  NMR (75.4 MHz,  $\text{CDCl}_3$ ):  $\delta$  196.3 ( $\text{CO}_{\text{trans}}$ ), 194.4 ( $\text{CO}_{\text{cis}}$ ), 147.3 ( $\text{CN-CH}_2$ ), 50.0 ( $\text{CH}_2\text{-N}_3$ ), 44.3 ( $\text{CH}_2\text{-NC}$ ); IR (KBr):  $\nu$  2187 (s, CN), 2104 (s,  $\text{N}_3$ ), 2069 (s, CO), 1923 (s, br, CO); MS (EI):  $m/z$  420 (22,  $[\text{M}]^+$ ), 392 (5,  $[\text{M} - \text{CO}]^+$ ), 364 (2,  $[\text{M} - 2\text{CO}]^+$ ), 336 (18,  $[\text{M} - 3\text{CO}]^+$ ), 308 (31,  $[\text{M} - 4\text{CO}]^+$ ), 280 (54,  $[\text{M} - 5\text{CO}]^+$ ).

**Complex 7:** The intramolecular cyclization of the isocyanide ligand in **5** was carried out in analogy to the method described for the cyclization of coordinated 2-azidophenyl isocyanide.<sup>4</sup> Complex **5** (0.84 g, 2.0 mmol) was dissolved in methanol (10 ml). To this was added  $\text{PMe}_3$  (2.2 mmol, 2.2 ml of an 1 M solution in THF) and the reaction mixture was stirred at ambient temperature until the gas evolution ceased (2 h). The intermediate iminophosphorane complex **6** was not isolated. The iminophosphorane was hydrolyzed by addition of 0.2 ml of  $\text{H}_2\text{O}$  containing two drops of concentrated HCl. The reaction mixture was stirred for 0.5 h. Then all volatiles were removed and the solid residue was purified by column chromatography (neutral  $\text{Al}_2\text{O}_3$ , hexane/diethyl ether 4:1, v:v). Complex **7** was isolated as a pale yellow powder. Crystals for an X-ray diffraction study were obtained by recrystallization from hexane/diethyl ether at  $-20\text{ }^\circ\text{C}$ . Yield 0.65 g (1.6 mmol, 80 %).  $^1\text{H}$  NMR (400 MHz,  $\text{THF-}d_6$ ):  $\delta$  7.53 (s, 2H, NH), 3.32 (s, 4H,  $\text{CH}_2$ );  $^{13}\text{C}\{^1\text{H}\}$  NMR (75.4 MHz,  $\text{THF-}d_6$ ):  $\delta$  202.2 (NCN), 200.4 ( $\text{CO}_{\text{trans}}$ ), 198.8 ( $\text{CO}_{\text{cis}}$ ), 45.0 ( $\text{CH}_2$ ); IR (KBr):  $\nu$  3475 (s, NH), 2063 (s, CO), 1888 (s, CO); MS (EI):  $m/z$  394 (70,  $[\text{M}]^+$ ), 366 (36,  $[\text{M} - \text{CO}]^+$ ), 338 (24,  $[\text{M} - 2\text{CO}]^+$ ), 310 (100,  $[\text{M} - 3\text{CO}]^+$ ), 282 (91,  $[\text{M} - 4\text{CO}]^+$ ), 254 (60,  $[\text{M} - 5\text{CO}]^+$ ). Anal. Calcd. for **7**,  $\text{C}_8\text{H}_6\text{N}_2\text{O}_5\text{W}$  (394.0): C, 24.39; H, 1.53; N, 7.11. Found: C, 24.99; H, 1.63; N, 6.85.

**Complex 8:** The N,N'-alkylation of complex **7** was carried out in analogy to the method described for the N,N'-alkylation of benzimidazolin-2-ylidenes.<sup>4</sup> A sample of 0.79 g (2.0 mmol) of complex **7** was dissolved in dry DMF (10 ml). To this was added  $\text{KO}^t\text{Bu}$  (2.2 mmol) and the reaction mixture was stirred for 2 h. Subsequently allyl bromide (0.27 g, 2.2

mmol) was added with a syringe and the reaction mixture was stirred for 4 h. The procedure deprotonation with KO<sup>t</sup>Bu and alkylation with allyl bromide was repeated for the second N-alkylation. Alternatively, alkylation of both N-functions can also be carried simultaneously in one deprotonation/alkylation sequence. All volatiles were removed under reduced pressure and the solid residue was purified by column chromatography (neutral Al<sub>2</sub>O<sub>3</sub>, hexane). Complex **8** was isolated as a pale yellow powder. Crystals for an X-ray diffraction study were obtained by recrystallization from hexane at -20 °C. Yield 0.57 g (1.2 mmol, 60 %). <sup>1</sup>H NMR (400 MHz, THF-*d*<sub>6</sub>): δ 5.81 (ddt, 2H, <sup>3</sup>J<sub>HH</sub> = 16, 10, 4 Hz, CH<sub>2</sub>-CH=CH<sub>2</sub>), 5.24 - 5.21 (m, 4H, CH<sub>2</sub>-CH=CH<sub>2</sub>), 4.36 (m, 4H, CH<sub>2</sub>-CH=CH<sub>2</sub>), 3.51(s, 4H, N-CH<sub>2</sub>-CH<sub>2</sub>-N); <sup>13</sup>C{<sup>1</sup>H} NMR (100.6 MHz, THF-*d*<sub>8</sub>): δ 207.7 (NCN), 201.6 (CO<sub>trans</sub>), 198.9 (CO<sub>cis</sub>), 134.5 (CH<sub>2</sub>-CH=CH<sub>2</sub>), 118.9 (CH<sub>2</sub>-CH=CH<sub>2</sub>), 56.5 (N-CH<sub>2</sub>-CH), 49.0 (N-CH<sub>2</sub>-CH<sub>2</sub>-N); MS (EI): *m/z* 474 (26, [M]<sup>+</sup>), 446 (18, [M - CO]<sup>+</sup>), 390 (23, [M - 3CO]<sup>+</sup>), 362 (100, [M - 4CO]<sup>+</sup>). Anal. Calcd. for **8**, C<sub>14</sub>H<sub>14</sub>N<sub>2</sub>O<sub>5</sub>W (474.13): C, 35.47; H, 2.98; N, 5.91. Found: C, 35.57; H, 2.84; N, 5.86.

## References:

- [1] M. O. Forster, S. H. Newman, *J. Chem. Soc.* 1911, **99**, 1277.
- [2] I. Ugi, U. Fetzer, U. Eholzer, H. Knapfer, K. Offermann, *Angew. Chem., Int. Ed. Engl.* 1965, **4**, 492.
- [3] J. Casanova, R. E. Schuster, N. D. Werner, *J. Chem. Soc.* 1963, 4280.
- [4] F. E. Hahn, V. Langenhahn, N. Meier, T. Lügger, W. P. Fehlhammer, *Chem. Eur. J.* 2003, **9**, 704.
